# Supplementary material
Source: publisher figshare collection journal article supplement (https://tandf.figshare.com/ndownloader/files/30774165)
Supplement: Supplementary file 1 [file 30774165]

## Sheet: ReadMe
	Equity Literature Database - Principles of international environmental law and indicators of equity
	Version:	v1
	Last updated:	2020-12-11
	Supplementary information for publication:	National ‘fair shares’ in reducing greenhouse gas emissions based on principles of international environmental law
	Authors:	Lavanya Rajamani, Louise Jeffery, Niklas Höhne, Frederic Hans, Alyssa Glass
	Content overview
	regime_overview	Overview of allocation regimes included in the database and an indication of their use in this study.
	study_overview	Overview of equity studies included in the database and an indication of their use in this study.

## Sheet: regime_overview
	Allocation regimes included and excluded in the analysis
	An overview of regimes included in the full equity input data.
	Regime	Include in Intl Law range?	Reason?	Category from Hoehne et al., (2014)
	Baseline	No	No an effort sharing appraoch	BAU
	Actual_emissions	No	Not an effort sharing approach
	Multistage_ms	Yes		Staged
	Immediate_equal_per_capita_allowances	Yes		Equality
	Contraction_and_convergence_by_2050	Yes		Equality
	Contraction_and_convergence_by_2100	No	Grandfathering, convergence by 2100	Equality
	Common_but_differentiated_convergence	Yes		Staged
	Common_but_differentiated_convergence_for_AI_80%_bellow_1990	Yes		Staged
	Common_but_differentiated_convergence_for_AI_85%_bellow_1990	Yes		Staged
	Common_but_differentiated_convergence_for_AI_90%_bellow_1990	Yes		Staged
	Common_but_differentiated_convergence_for_AI_95%_bellow_1990	Yes		Staged
	Historical_responsibility	Yes		Responsibility
	Emission_intensity_(per_GDP)	No	Potential based	Capability
	Triptych	No	Cost and feasibility based	Staged
	South_North_Dialogue	Yes		Staged
	Greenhouse_development_rights	Yes		Resp_cap_need
	Equal_carbon_budget	Yes		Eq._cumulative_per_capita_emissions
	Equal_marginal_cost___tax	No	Costs based	Capability_costs
	Grandfathering	No	Grandfathering	Staged
	RCSD_-_Responsibility,_Capability_and_Sustainable_Development_with_HR_from_1850_incl_LUCF_in_HR_calculation	Yes		Resp_cap_need
	RCSD_-_Responsibility,_Capability_and_Sustainable_Development_with_HR_from_1850_excl_LUCF_in_HR_calculation	Yes		Resp_cap_need
	RCSD_-_Responsibility,_Capability_and_Sustainable_Development_with_HR_from_1970_incl_LUCF_in_HR_calculation	Yes		Resp_cap_need
	RCSD_-_Responsibility,_Capability_and_Sustainable_Development_with_HR_from_1970_excl_LUCF_in_HR_calculation	Yes		Resp_cap_need
	Common_but_differentiated_Responsabilities_for_20_Gt_CO2_emission_target_(individual_emissions)	Yes		Capability
	Common_but_differentiated_Responsabilities_for_25_Gt_CO2_emission_target_(individual_emissions)	Yes		Capability
	Common_but_differentiated_Responsabilities_for_30_Gt_CO2_emission_target_(individual_emissions)	No	Emission level too high	Capability
	Common_but_differentiated_Responsabilities_for_33_Gt_CO2_emission_target_(individual_emissions)	No	Emission level too high	Capability
	Common_but_differentiated_Responsabilities_for_35_Gt_CO2_emission_target_(individual_emissions)	No	Emission level too high	Capability
	Common_but_differentiated_Responsabilities_for_20P,25P,30P,33P,35P_Gt_CO2_emission_target_(individual_emissions)	Yes		Capability
	Common_but_differentiated_Responsabilities_for_20P,25P,30P,33P,35P_Gt_CO2_emission_target_(individual_emissions)	Yes		Capability
	Equal_carbon_budget_-_Historical_Responsibility	Yes		Eq._cumulative_per_capita_emissions
	Equal_carbon_budget_-_Future_Responsibility	Yes		Eq._cumulative_per_capita_emissions
	028_Knopf_et_al._2012_-_Global_shares_of_population,_income,_capacity,__cumulative_emissions,_responsibility_and_obligation	No	study excluded	Resp_cap_need
	028_Knopf_et_al._2012_-_C&C_but_historic_emissions_since_1990_are_taken_into_account_in_that_sense_that_equal__mission_rights_are_assumed_for_the_period_from_1990-2005	No	study excluded	Equality
	convergence_to_equal_per_capita,_equal_to_Annex_I	No	Nabel et al., study, no stabilisation level given	Equality
	Equal_carbon_budget,_equal_to_Annex_I	No	Nabel et al., study, no stabilisation level given	Eq._cumulative_per_capita_emissions
	2050_allocation_with_developed_at_30%_and_developing_at_70%_of_2000_emissions	No	costs; mitigation potential component	Capability_costs
	Full_compensation_of_all_costs_in_developing_countries_with_developed_countries_given_equal_allowances_as_a_percentage_of_their_year_2000_emissions	No	costs; mitigation potential component	Capability_costs
	Full_compensation_of_all_costs_in_developing_countries_with_developed_bearing_equal_percentage_costs	No	costs; mitigation potential component	Capability_costs
	Clasification:_Intertermporal_general_equilibrium_model._Approach:_Optimization_with_perfect_foresight_over_whole_period._Objective:_Welfare_maximization	Yes		Equality
	Classification:_Energy_system_model._Approach:_Recursive_dynamic._Objective:_Cost_minimization	Yes		Equality
	Clasification:_Intertermporal_general_equilibrium_model._Approach:_Optimization_with_perfect_foresight_over_whole_period._Objective:_Welfare_maximization	Yes		Equality
	Indicative_Annual_Emissions_and_Emission_Trajectories_–_1850_Basis	Yes		Eq._cumulative_per_capita_emissions
	Indicative_Annual_Emissions_and_Emission_Trajectories_–_1970_Basis	Yes		Eq._cumulative_per_capita_emissions
	Equal_costs	No		Capability_costs
	C&C	Yes		Equality
	Adjusted_equal_per_capita_annual_emission	No	Pan et al. study excluded, because overtaken by newer study	Equality
	Ability_to_pay	No	Pan et al. study excluded, because overtaken by newer study	Capability
	Sharing_reductions_among_one_billion_high_emitters	No	Pan et al. study excluded, because overtaken by newer study	Responsibility
	Contraction_and_convergence_(by_2050)	No	Pan et al. study excluded, because overtaken by newer study	Equality
	CSE_convergence	No	Pan et al. study excluded, because overtaken by newer study	Equality
	Emission_intensity_targets	No	Pan et al. study excluded, because overtaken by newer study	Capability
	Equal_per_capita_annual_emission	No	Pan et al. study excluded, because overtaken by newer study	Equality
	Greenhouse_development_rights	No	Pan et al. study excluded, because overtaken by newer study	Resp_cap_need
	Indian_prime_minister's_proposal	No	Pan et al. study excluded, because overtaken by newer study	Equality
	Multi-criteria_convergence	No	Pan et al. study excluded, because overtaken by newer study	Staged
	Prefenece_score_approach	No	Pan et al. study excluded, because overtaken by newer study	Staged
	South-North_dialogue	Yes		Staged
	Tripthch_approach_(3_sectors)	No	Potential Based	Staged
	Equal_per_capita_annual_emission	Yes		Equality
	Capability	Yes		Capability
	Equal cumulative per capita_2100	Yes	convergence of cumulative emissions in 2100	eq._Cumulative_per_capita_emissions
	Greenhouse_development_rights	Yes		Resp_cap_need
	Constant Emissions Ratios	No	Grandfathering	Staged

## Sheet: study_overview
	Equity Literature - Overview
	Details and overview of all equity literature included in the equity literature database
		Study_ID	Included in full dataset	Included in international law range	Reason	Publication Title	Publication year	How to cite
		001_den_Elzen_2012	Yes	Yes		Reduction targets and abatement costs of developing countries resulting from global and developed countries’ reduction targets by 2050	2012	den Elzen, M. G. J., Beltran, A. M., Hof, A. F., van Ruijven, B., & van Vliet, J. (2013). Reduction targets and abatement costs of developing countries resulting from global and developed countries’ reduction targets by 2050. Mitigation and Adaptation Strategies for Global Change, 18(4), 491–512. http://doi.org/10.1007/s11027-012-9371-9
		002_van_Vuuren_2010	Yes	Yes		Low stabilization scenarios and implications for major world regions from an integrated assessment perspective	2010	Van Vuuren, D. P., Isaac, M., Den Elzen, M. G. J., Stehfest, E., & Van Vliet, J. (2010). Low stabilization scenarios and implications for major world regions from an integrated assessment perspective. Energy Journal, 31(SPECIAL ISSUE), 165–192. http://doi.org/10.5547/ISSN0195-6574-EJ-Vol31-NoSI-7
		003_Hof_et_al._2010	No	No	Baseline data only	The effect of different historical emissions datasets on emission targets of the sectoral mitigation approach Triptych	2010	Hof, A. F., & Den Elzen, M. G. J. (2010). The effect of different historical emissions datasets on emission targets of the sectoral mitigation approach Triptych. Climate Policy, 10(6), 684–704. http://doi.org/10.3763/cpol.2009.0649
		004_Knopf_et_al._2009	No	No	Convergence by 2100 historic data is energy CO2 only	The economics of low stabilisation: implications for technological change and policy	2009	Knopf, B., Edenhofer, O., Barker, T., Bauer, N., Baumstark, L., Chateau, B., … Vuuren Van, D. (2009). The economics of low stabilisation: Implications for technological change and policy. In M. Hulme (Ed.), Making Climate Change Work for Us: European Perspectives on Adaptation and Mitigation Strategies (1st ed., pp. 291–318). Cambridge: ADAM synthesis book, Cambridge University Press.
		005_den_Elzen_et_al._2008_b	No	No	2050 target pathway is too high.	Regional abatement action and costs under allocation schemes for emission allowances for achieving low CO2-equivalent concentrations.	2008	den Elzen, M. G. J., Lucas, P. L., & van Vuuren, D. P. (2008). Regional abatement action and costs under allocation schemes for emission allowances for achieving low CO2-equivalent concentrations. Climatic Change, 90, 243–268.
		007_Hof_den_Elzen_2010	Yes	No	Triptych is a mitigaiton potential approach	The effect of different historical emissions datasets on emission targets of the sectoral mitigation approach Triptych	2010	Hof, A. F., & Den Elzen, M. G. J. (2010). The effect of different historical emissions datasets on emission targets of the sectoral mitigation approach Triptych. Climate Policy, 10(6), 684–704. http://doi.org/10.3763/cpol.2009.0649
		008_den_Elzen_et_al._2008a	Yes	No	Triptych is a mitigaiton potential approach	The Triptych approach revisited - A staged sectoral approach for climate mitigation	2008	den Elzen, M. G. J., Höhne, N., & Moltmann, S. (2008). The Triptych approach revisited - A staged sectoral approach for climate mitigation. Energy Policy, 36(2008), 1107–1124.
		009_van_Vuuren_2009	Partial	Partial		Comparison of different climate regimes: the impact of broadening participation	2009	van Vuuren, D. P., den Elzen, M. G. J., van Vliet, J., Kram, T., Lucas, P., & Isaac, M. (2009). Comparison of different climate regimes: the impact of broadening participation. http://doi.org/10.1016/j.enpol.2009.07.058
		010_den_Elzen_et_al._2007	Partial	Partial	450ppm scenario only	Differentiation of countries’ future commitments in a post-2012 climate regime: An assessment of the “South–North Dialogue” Proposal	2007	den Elzen, M. G. J., Höhne, N., Brouns, B., Winkler, H., & Ott, H. E. (2007). Differentiation of countries’ future commitments in a post-2012 climate regime: An assessment of the “South–North Dialogue” Proposal. Environmental Science & Policy, 10(3), 185–203. http://doi.org/10.1016/j.envsci.2006.10.009
		011_den_Elzen_and_Meinshausen_2006	Yes	Yes		Meeting the EU 2°C climate target: global and regional emission implications	2006	den Elzen, M. G. J., & Meinshausen, M. (2006). Meeting the EU 2°C climate target: global and regional emission implications. Climate P, 6(5), 545–564.
		012_den_Elzen_et_al._2005	No	No	Baseline only	Abatement costs of post-Kyoto climate regimes	2005	den Elzen, M. G. J., Lucas, P., & van Vuuren, D. P. (2005). Abatement costs of post-Kyoto climate regimes. Energy Policy, 33(16), 2138–2151.
		013_den_Elzen_and_Lucas_2005	No	No	Baseline only	The FAIR model: A tool to analyse environmental and costs implications of regimes of future commitments	2005	Den Elzen, M. G. J., & Lucas, P. L. (2005). The FAIR model: A tool to analyse environmental and costs implications of regimes of future commitments. Environmental Modeling and Assessment, 10(2), 115–134. http://doi.org/10.1007/s10666-005-4647-z
		014_Criqui_et_al._2003	No	No	Baseline only	Greenhouse gas reduction pathways in the UNFCCC Process up to 2025	2003	Criqui, P., Kitous, A., Berk, M., den Elzen, M. G. J., Eickhout, B., Lucas, P., … Vanregemorter, D. (2003). Greenhouse gas reduction pathways in the UNFCCC Process up to 2025 - Technical Report. Grenoble; France.
		015_Berk_and_den_Elzen_2001	No	No	Baseline only	Options for differentiation of future commitments in climate policy: how to realise timely participation to meet stringent climate goals?	2001	Berk, M. M., & den Elzen, M. G. J. (2001). Options for differentiation of future commitments in climate policy: how to realise timely participation to meet stringent climate goals? Climate Policy, 1(4), 465–480.
		016_Kuntsi-Reunanen_and_Luukkanen_2006	No	No	2050 target pathway is too high.	. Greenhouse gas emission reductions in the post-Kyoto period: Emission intensity changes required under the “contraction and convergence” approach	2006	Kuntsi-Reunanen, E., & Luukkanen, J. (2006). Greenhouse gas emission reductions in the post-Kyoto period: Emission intensity changes required under the “contraction and convergence” approach. Natural Resources Forum, 30(4), 272–279. http://doi.org/10.1111/j.1477-8947.2006.00119.x
		017_Winkler_et_al._2010	No	No		A South African approach – responsibility, capability and sustainable development	2010	Winkler, H., Letete, T., & Marquard, A. (2011). A South African approach – responsibility, capability and sustainable development. In H. Winkler, T. Jayaraman, J. Pan, A. Santhiago de Oliveira, Y. Zhang, & G. Sant (Eds.), Equitable access to sustainable development: Contribution to the body of scinetific knowledge. A paper by experts from BASIC countries (pp. 78–89). BASIC experts.
		018_Chakravarty_et_al._2009	Yes	Yes		Sharing global CO2 emission reductions among one billion high emitters.	2009	Chakravarty, S. P., Chikkatur, A., Coninck, H., Pacala, S., Socolow, R., & Tavoni, M. (2009). Sharing global CO2 emission reductions among one billion high emitters. Proceedings of the National Academy of Sciences USA, 106(29), 11884–11888.
		019_Bows_and_Anderson_2008	Yes	No	C&C by 2100	Contraction and convergence: an assessment of the CC Options model.	2008	Bows, A., & Anderson, K. (2008). Contraction and convergence: an assessment of the CC Options model. Climatic Change, 91(3–4), 275–290. http://doi.org/10.1007/s10584-008-9468-z
		021_Vaillancourt_and_Waaub_2004	No	No	2050 target pathway is too high.	Equity in international greenhouse gases abatement scenarios: A multicriteria approach	2004	Vaillancourt, K., & Waaub, J. P. (2004). Equity in international greenhouse gases abatement scenarios: A multicriteria approach. European Journal of Operational Research, 153(2), 489–505. http://doi.org/10.1016/S0377-2217(03)00170-X
		022_Miketa_and_Schrattenholzer_2006	No	No	2050 target pathway is too high.	Equity implications of two burden-sharing rules for stabilizing greenhouse-gas concentrations	2006	Miketa, A., & Schrattenholzer, L. (2006). Equity implications of two burden-sharing rules for stabilizing greenhouse-gas concentrations. Energy Policy, 34(7), 877–891.
		023_Bode_2004	No	No	2050 target pathway is too high.	Equal emissions per capita over time - A proposal to combine responsibility and equity of rights for post-2012 GHG emission entitlement allocation.	2004	Bode, S. (2004). Equal emissions per capita over time - A proposal to combine responsibility and equity of rights for post-2012 GHG emission entitlement allocation. European Environment, 14(5), 300–316. http://doi.org/10.1002/eet.359
		025_Boehringer_and_Welsch_2006	No	No	baseline only	Burden sharing in a greenhouse: Egalitarianism and sovereignty reconciled.	2006	Böhringer, C., & Welsch, H. (2006). Burden sharing in a greenhouse: Egalitarianism and sovereignty reconciled. Applied Economics, 38(9), 981–996. http://doi.org/10.1080/00036840500399453
		026_Groennenberg_et_al._2004	No	No	2050 target pathway is too high.	Global Triptych: a bottom-up approach for the differentiation of commitments under the Climate Convention.	2004	Groenenberg, H., Blok, K., & van der Sluijs, J. P. (2004). Global Triptych: a bottom-up approach for the differentiation of commitments under the Climate Convention. Climate Policy, 4(2), 153–175. http://doi.org/10.1080/14693062.2004.9685518
		027_WBGU_2009	Yes	Yes		Solving the climate dilemma: The budget approach	2009	WBGU. (2009). Solving the climate dilemma: The budget approach. Berlin.
		028_Knopf_et_al._2012	No	No	Energy CO2 only	A global carbon market and the allocation of emission rights.	2012	Knopf, B., Kowarsch, M., Lüken, M., Edenhofer, O., & Luderer, G. (2012). A global carbon market and the allocation of emission rights. In O. Edenhofer, J. Wallacher, H. Lotze-Campen, H. Reder, B. Knopf, & J. Müller (Eds.), Climate Change, Justice and Sustainability: Linking Climate and Development Policy (pp. 179–191). Springer. http://doi.org/10.1007/978-94-007-4540-7
		031_Nabel_et_al._2011	Yes	No	Cumulative per capita by 2100.	Decision support for international climate policy – The PRIMAP emission module.	2011	Nabel, J. E. M. S., Rogelj, J., Chen, C. M., Markmann, K., Gutzmann, D. J. H., & Meinshausen, M. (2011). Decision support for international climate policy – The PRIMAP emission module. Environmental Modelling & Software, 26(12), 1419–1433.
		032_Peterson_and_Klepper_2007	No	No	Baseline only	Distribution Matters – Taxes vs . Emissions Trading in Post Kyoto Climate Regimes	2007	Peterson, S., & Klepper, G. (2007). Distribution Matters – Taxes vs . Emissions Trading in Post Kyoto Climate Regimes. Kiel; Germany.
		034_Onigkeit_et_al._2009	Yes	Yes	2050 C&C	Fairness aspects of linking the European emissions trading scheme under a long-term stabilization scenario for CO2 concentration.	2009	Onigkeit, J., Anger, N., & Brouns, B. (2009). Fairness aspects of linking the European emissions trading scheme under a long-term stabilization scenario for CO2 concentration. Mitigation and Adaptation Strategies for Global Change, 14(5), 477–494. http://doi.org/10.1007/s11027-009-9177-6
		035_Jacoby_et_al._2008	Yes	No	Costs based approach	Sharing the Burden of GHG Reductions.	2008	Jacoby, H. D., Babiker, M. H., Paltsev, S., & Reilly, J. M. (2008). Sharing the Burden of GHG Reductions. Massachusetts; USA.
		036_Edenhofer_et_al._2010	No	No	Energy CO2 only	The economics of low stabilization: Model comparison of mitigation strategies and costs.	2010	Edenhofer, O., Knopf, B., Barker, T., Baumstark, L., Bellevrat, E., Chateau, B., … Van Vuuren, D. P. (2010). The economics of low stabilization: Model comparison of mitigation strategies and costs. Energy Journal, 31(SPECIAL ISSUE), 11–48. http://doi.org/10.5547/ISSN0195-6574-EJ-Vol31-NoSI-2
		037_Hoehne_and_Moltmann_2009b	Yes	Yes	C&C by 2050	Sharing the effort under a global carbon budget.	2009	Höhne, N., & Moltmann, S. (2009). Sharing the effort under a global carbon budget. Cologne.
		038_Hoehne_and_Moltmann_2008	Partial	Partial	Exclude Triptych and C&C 2100	Distribution of emission allowances under the Greenhouse Development Rights and other effort sharing approaches.	2008	Höhne, N., & Moltmann, S. (2008). Distribution of emission allowances under the Greenhouse Development Rights and other effort sharing approaches. Berlin.
		042_Jayaraman_et_al._2011	Yes	Yes		Equitable access to sustainable development: An Indian Approach	2011	Jayaraman, T., Kanitkar, T., & Dsouza, M. (2011). Equitable access to sustainable development: An Indian approach. In H. Winkler, T. Jayaraman, J. Pan, A. Santhiago de Oliveira, Y. Zhang, & G. Sant (Eds.), Equitable access to sustainable development: Contribution to the body of scinetific knowledge. A paper by experts from BASIC countries (pp. 59–77).
		043_Kriegler_et_al_2013_-_NIES	Partial	Partial	Include C&C only	Can we still meet 2°C with global climate action? The LIMITS study on implications of Durban Action Platform scenarios.	2013	Krieger, E., Tavoni, M., Aboumahboub, T., Luderer, G., Calvin, K., DeMaere, G., … van Vuuren, D. P. (2014). Can we still meet 2°C with global climate action? The LIMITS study on implications of Durban Action Platform scenarios. LIMITS, (Special Issue), 1–30.
		044_Kriegler_et_al_2013_-_PNNL	Partial	Partial	Include C&C only	Can we still meet 2°C with global climate action? The LIMITS study on implications of Durban Action Platform scenarios.	2013	Krieger, E., Tavoni, M., Aboumahboub, T., Luderer, G., Calvin, K., DeMaere, G., … van Vuuren, D. P. (2014). Can we still meet 2°C with global climate action? The LIMITS study on implications of Durban Action Platform scenarios. LIMITS, (Special Issue), 1–30.
		045_Kriegler_et_al_2013_-_PBL	Partial	Partial	Include C&C only	Can we still meet 2°C with global climate action? The LIMITS study on implications of Durban Action Platform scenarios.	2013	Krieger, E., Tavoni, M., Aboumahboub, T., Luderer, G., Calvin, K., DeMaere, G., … van Vuuren, D. P. (2014). Can we still meet 2°C with global climate action? The LIMITS study on implications of Durban Action Platform scenarios. LIMITS, (Special Issue), 1–30.
		046_Kriegler_et_al_2013_-_IIASA	Partial	Partial	Include C&C only	Can we still meet 2°C with global climate action? The LIMITS study on implications of Durban Action Platform scenarios.	2013	Krieger, E., Tavoni, M., Aboumahboub, T., Luderer, G., Calvin, K., DeMaere, G., … van Vuuren, D. P. (2014). Can we still meet 2°C with global climate action? The LIMITS study on implications of Durban Action Platform scenarios. LIMITS, (Special Issue), 1–30.
		047_Kriegler_et_al_2013_-_PIK	Partial	Partial	Include C&C only	Can we still meet 2°C with global climate action? The LIMITS study on implications of Durban Action Platform scenarios.	2013	Krieger, E., Tavoni, M., Aboumahboub, T., Luderer, G., Calvin, K., DeMaere, G., … van Vuuren, D. P. (2014). Can we still meet 2°C with global climate action? The LIMITS study on implications of Durban Action Platform scenarios. LIMITS, (Special Issue), 1–30.
		048_Kriegler_et_al_2013_-_FEEM	Partial	Partial	Include C&C only	Can we still meet 2°C with global climate action? The LIMITS study on implications of Durban Action Platform scenarios.	2013	Krieger, E., Tavoni, M., Aboumahboub, T., Luderer, G., Calvin, K., DeMaere, G., … van Vuuren, D. P. (2014). Can we still meet 2°C with global climate action? The LIMITS study on implications of Durban Action Platform scenarios. LIMITS, (Special Issue), 1–30.
		049_Kober_T._et_al._(submitted)_-_ECN	No	No	Data issues	The role of burden sharing regimes to reach the global 2 ˚ C climate target TIAM-ECN model approach Cost optimal GHG mitigation to reach the global 2 ˚ C climate target.	2012	Kober, T., Zwaan, B. Van Der, & Rösler, H. (2012, December). The role of burden sharing regimes to reach the global 2 ˚ C climate target TIAM-ECN model approach Cost optimal GHG mitigation to reach the global 2 ˚ C climate target. ECN, pp. 1–12. Eindhoven.
		050_Baer_et_al._2008	Yes	Yes		The Greenhouse Development Rights framework. The right to development in a climate constrained world.	2008	Baer, P., Athanasiou, T., Kartha, S., & Kemp-Benedict, E. (2008). The Greenhouse Development Rights framework. The right to development in a climate constrained world. Berlin.
		051_Xunzhang_Pan,_Fei_teng_and_Gehua_Wang_2013	No	No	Energy CO2 only	Sharing emission space at an equitable basis: Allocation scheme based on the equal cumulative emission per capita principle	2013	Pan, X., Teng, F., & Wang, G. (2013). Sharing emission space at an equitable basis: Allocation scheme based on the equal cumulative emission per capita principle. Applied Energy, 113, 1810–1818. http://doi.org/10.1016/j.apenergy.2013.07.021
		052_Xunzhang_Pan,_Fei_teng_and_Gehua_Wang_2013	No	No	Energy CO2 only	Sharing emission space at an equitable basis: Allocation scheme based on the equal cumulative emission per capita principle	2013	Pan, X., Teng, F., & Wang, G. (2013). Sharing emission space at an equitable basis: Allocation scheme based on the equal cumulative emission per capita principle. Applied Energy, 113, 1810–1818. http://doi.org/10.1016/j.apenergy.2013.07.021
		055_EVOC_A1FI_CAT	Yes	Yes		Various	2014	https://www.transparency-partnership.net/sites/default/files/uba_-_quantifiying_emission_reductions_by_d.c_0.pdf
		056_EVOC_B2_CAT	Yes	Yes		Various	2014	https://www.transparency-partnership.net/sites/default/files/uba_-_quantifiying_emission_reductions_by_d.c_0.pdf
		057_Robiou_2016	Yes	Partial	Exclude constant emission ratio (CER) (grandfathering)	Equitable mitigation to achieve the Paris Agreement goals	2016	Robiou du Pont, Y., Jeffery, M. L., Gütschow, J., Rogelj, J., Christoff, P., & Meinshausen, M. (2016). Equitable mitigation to achieve the Paris Agreement goals. Nature Climate Change, 7(1), 38–43. http://doi.org/10.1038/nclimate3186
		058_Pan_etal_2017	Partial	Partial	Excluding: GF - grandfathering EIT - Emissions intensity targets	Exploring fair and ambitious mitigation contributions under the Paris Agreement goals	2017	doi: 10.1016/j.envsci.2017.04.020
		059_Holz_etal_2017	Yes	Yes		Fairly sharing 1.5: national fair shares of a 1.5 °C-compliant global mitigation effort	2017	doi: 10.1007/s10784-017-9371-z
		060_vanderBerg_etal_2019	Yes	No	Start date too late (2020) which implies strong grandfathering	Implications of various effort-sharing approaches for national carbon budgets and emission pathways	2019	doi: 10.1007/s10584-019-02368-y
